# Supplementary material
Source: HighWire-hosted journal article supplement (https://erj.ersjournals.com/content/52/5/1801467)
Supplement: inline-supplementary-material-2 [file inline-supplementary-material-2.pdf]

|                                                                | Total              | Cohort 1          | Cohort 2           | *p      |
|----------------------------------------------------------------|--------------------|-------------------|--------------------|---------|
| <u>Demographics and treatment</u>                              |                    |                   |                    |         |
| Age (years) Mean $\pm$ SD                                      | 57.98 $\pm$ 19.39  | 52.17 $\pm$ 19.60 | 61.26 $\pm$ 18.54  | 0.0002  |
| Sex (% male)                                                   | 39.4               | 45.1              | 36.3               | 0.1644  |
| VTE provoked (%)                                               | 53.9               | 52.9              | 54.4               | 0.9013  |
| Recent travel for > 3 hours (%)                                | 12.3               | 12.7              | 12.1               | 0.8532  |
| Trauma or LE fracture within 3 months (%)                      | 9.9                | 10.8              | 9.3                | 0.6838  |
| Bed rest (%)                                                   | 16.2               | 8.8               | 20.3               | 0.0118  |
| Surgery or anesthesia within 3 months (%)                      | 14.8               | 9.9               | 17.6               | 0.1153  |
| Family history of VTE (%)                                      | 22.9               | 31.4              | 18.0               | 0.0121  |
| Active cancer (%)                                              | 8.5                | 2.0               | 12.1               | 0.003   |
| Concomitant DVT (%)                                            | 47.5               | 34.3              | 54.9               | 0.0009  |
| DVT in lower extremity (%)                                     | 33.7               | 33.3              | 33.9               | 1       |
| Time from first symptom to diagnosis (days) Mean $\pm$ SD      | 13.17 $\pm$ 25.12  | 11.16 $\pm$ 17.09 | 14.29 $\pm$ 28.61  | 0.0409  |
| Diagnosis by CTPA, rather than VQ (%)                          | 72.5               | 74.5              | 71.4               | 0.6778  |
| Initial pulmonary vascular obstruction, mean $\pm$ SD          | 35.8 $\pm$ 24.1    | 38.8 $\pm$ 25.9   | 34.1 $\pm$ 22.9    | 0.1383  |
| Days of anticoagulation Mean $\pm$ SD                          | 224.7 $\pm$ 145.39 | 212.5 $\pm$ 82.80 | 231.8 $\pm$ 171.42 | 0.91    |
| Extended duration anticoagulation (%)                          | 21.5               | 16.7              | 24.2               | 0.1752  |
| Interval from diagnosis to study VQ scan (days), mean $\pm$ SD | 304 $\pm$ 105      | 258 $\pm$ 75      | 330 $\pm$ 111      | <0.0001 |
| <u>Clinical laboratory</u>                                     |                    |                   |                    |         |
| Factor V <sub>Leiden</sub> (%)                                 | 9.1                | 15.9              | 6.2                | 0.025   |
| Prothrombin 20210a (%)                                         | 7.8                | 13.0              | 5.6                | 0.0637  |
| Fibrinogen A $\alpha$ T312A (%)                                | 45.2               | 57.6              | 37.3               | 0.0019  |
| Antithrombin 3 (IU/dL) Mean $\pm$ SD                           | 96.84 $\pm$ 11.74  | 97.54 $\pm$ 12.95 | 96.50 $\pm$ 11.13  | 0.5982  |
| Protein C value (IU/dL) Mean $\pm$ SD                          | 102.40 $\pm$ 21.41 | 98.45 $\pm$ 24.81 | 104.10 $\pm$ 19.69 | 0.0749  |
| Protein S value (IU/dL) Mean $\pm$ SD                          | 89.48 $\pm$ 21.26  | 89.18 $\pm$ 20.76 | 89.60 $\pm$ 21.53  | 0.9643  |
| Fibrinogen (g/L) Mean $\pm$ SD                                 | 3.79 $\pm$ 1.05    | 4.28 $\pm$ 1.13   | 3.52 $\pm$ 0.89    | <0.0001 |
| Platelet (G/l) Mean $\pm$ SD                                   | 258.8 $\pm$ 74.09  | 258.8 $\pm$ 86.43 | 258.9 $\pm$ 68.48  | 0.6496  |
| Prothrombin ratio (% control) Mean $\pm$ SD                    | 81.96 $\pm$ 19.81  | 78.97 $\pm$ 18.52 | 83.75 $\pm$ 20.38  | 0.001   |
| Thrombin (%) Mean $\pm$ SD                                     | 88.80 $\pm$ 28.91  | 83.35 $\pm$ 30.13 | 93.76 $\pm$ 27.03  | 0.0811  |
| FV (%) Mean $\pm$ SD                                           | 104.9 $\pm$ 25.85  | 106.2 $\pm$ 26.58 | 103.8 $\pm$ 25.32  | 0.9201  |

|                                              |                   |                   |                   |         |
|----------------------------------------------|-------------------|-------------------|-------------------|---------|
| FVII (%) Mean ± SD                           | 93.14 ± 38.20     | 86.67 ± 40.75     | 100.30 ± 34.10    | 0.1526  |
| <u>Fibrin property</u>                       |                   |                   |                   |         |
| Aα-chain aphosphorylated (%) Mean ± SD       | 37.74 ± 9.16      | 36.32 ± 6.88      | 38.66 ± 10.28     | 0.2214  |
| Aα-chain monophosphorylated (%) Mean ± SD    | 32.20 ± 3.47      | 31.68 ± 2.33      | 32.54 ± 4.02      | 0.0028  |
| Aα-chain diphosphorylated (%) Mean ± SD      | 30.06 ± 8.04      | 32.00 ± 5.96      | 28.80 ± 8.94      | 0.0048  |
| Phosphorylation per Aα-chain Mean ± SD       | 0.92 ± 0.17       | 0.96 ± 0.13       | 0.90 ± 0.19       | 0.0533  |
| Bβ-chain monosialylated (%) Mean ± SD        | 58.45 ± 6.97      | 58.25 ± 7.38      | 58.58 ± 6.71      | 0.836   |
| Bβ-chain hydroxylated (%) Mean ± SD          | 21.83 ± 9.69      | 20.94 ± 5.13      | 22.40 ± 11.72     | 0.0289  |
| des-gln461 Bβ-chain (%) Mean ± SD            | 11.24 ± 9.54      | 5.95 ± 1.69       | 14.66 ± 10.88     | <0.0001 |
| γ-chain monosialylated (%) Mean ± SD         | 70.63 ± 7.37      | 71.76 ± 5.90      | 69.90 ± 8.12      | 0.1289  |
| γ' (%) Mean ± SD                             | 2.74 ± 1.67       | 3.47 ± 1.35       | 2.26 ± 1.69       | <0.0001 |
| α-chain crosslinking (%) Mean ± SD           | 30.38 ± 12.80     | 34.46 ± 14.72     | 27.93 ± 10.82     | 0.0001  |
| Clot permeability (Ks) Mean ± SD             | 5.2e-10 ± 2.3e-10 | 6.2e-10 ± 2.3e-10 | 4.5e-10 ± 2.0e-10 | <0.0001 |
| Accessibility of B-knob (ug bound) Mean ± SD | 2.23 ± 0.76       | 2.05 ± 0.85       | 2.34 ± 0.69       | 0.0001  |
| Clot turbidity (OD) Mean ± SD                | 0.21 ± 0.06       | 0.22 ± 0.05       | 0.21 ± 0.06       | 0.0022  |
| Lysis rate (OD/min) Mean ± SD                | -0.0015 ± 0.0004  | -0.0017 ± 0.0004  | -0.0014 ± 0.0004  | <0.0001 |
| Corrected lysis rate (ratio/min) Mean ± SD   | -0.73 ± 0.20      | -0.78 ± 0.19      | -0.70 ± 0.20      | 0.0048  |
| Time to complete lysis (min) Mean ± SD       | 139.4 ± 34.34     | 128.0 ± 23.87     | 146.6 ± 37.88     | <0.0001 |
| Fibrinogen mass variants (%)                 | 17.6              | 13.0              | 20.6              | 0.1323  |
| <u>Outcomes</u>                              |                   |                   |                   |         |
| RPVO ≥ 10%                                   | 75 (26.4%)        | 29 (28.4%)        | 46 (25.2%)        | 0.5770  |
| CTEPH (%)                                    | 2.8               | 2.0               | 3.3               | 0.7155  |

**Table S1. Comparison of characteristics between cohort 1 and cohort 2.** Wilcoxon-Mann-Whitney was used to calculate p-values for continuous variables. Fisher's exact test was used for binary variables.

|                                                           | Cohort 1                             |                                       |        | Cohort 2                               |                                       |       |
|-----------------------------------------------------------|--------------------------------------|---------------------------------------|--------|----------------------------------------|---------------------------------------|-------|
|                                                           | Patients with<br>RPVO <10%<br>(n=73) | Patients with<br>RPVO ≥ 10%<br>(n=29) | p      | Patients with<br>RPVO < 10%<br>(n=136) | Patients with<br>RPVO ≥ 10%<br>(n=46) | p     |
| <u>Demographics and treatment</u>                         |                                      |                                       |        |                                        |                                       |       |
| Age (years) Mean ± SD                                     | 49.3 ± 18.1                          | 59.4 ± 21.6                           | 0.02   | 59.2 ± 19.3                            | 67.4 ± 14.4                           | 0.02  |
| Males                                                     | 45.2 %                               | 44.8 %                                | 1.00   | 40.4 %                                 | 33.9 %                                | 0.05  |
| Provoked VTE                                              | 60.3 %                               | 34.5 %                                | 0.03   | 55.1 %                                 | 52.2 %                                | 0.74  |
| Travel > 3 hours                                          | 15.1 %                               | 6.9 %                                 | 0.34   | 12.5 %                                 | 10.9 %                                | 1.00  |
| Trauma or LE fracture within 3 months                     | 12.3 %                               | 6.9 %                                 | 0.72   | 10.3 %                                 | 6.5 %                                 | 0.57  |
| Recent bed rest                                           | 12.3 %                               | 0 %                                   | 0.06   | 22.8 %                                 | 13 %                                  | 0.20  |
| Surgery or general anesthesia within 3 months             | 11.1 %                               | 6.9 %                                 | 0.72   | 18.4 %                                 | 15.2 %                                | 0.82  |
| Active cancer                                             | 2.7 %                                | 0.0 %                                 | 1.00   | 13.2 %                                 | 8.7 %                                 | 0.60  |
| Family history of VTE                                     | 32.9 %                               | 27.6 %                                | 0.64   | 20.5 %                                 | 10.9 %                                | 0.18  |
| Concomitant DVT                                           | 30.1 %                               | 44.8 %                                | 0.17   | 52.9 %                                 | 60.9 %                                | 0.39  |
| Concomitant lower extremity DVT                           | 28.8 %                               | 44.8 %                                | 0.16   | 32.8 %                                 | 37.2 %                                | 0.71  |
| Concomitant upper extremity DVT                           | 0.0 %                                | 0.0 %                                 | NA     | 22.1 %                                 | 27.9 %                                | 0.53  |
| Interval from symptoms to diagnosis (days) Mean ± SD      | 8.7 ± 15.5                           | 17.1 ± 19.4                           | 0.001  | 12.5 ± 25.4                            | 19.8 ± 36.3                           | 0.34  |
| Initial pulmonary vascular obstruction (%) Mean ± SD      | 32.4 ± 23.2                          | 54.9 ± 25.9                           | 0.0001 | 30.7 ± 22.1                            | 44.1 ± 22.4                           | 0.001 |
| Duration of anti-coagulation (days) Mean ± SD             | 211.0 ± 85.9                         | 217.6 ± 73.3                          | 0.54   | 230.7 ± 156.1                          | 235.9 ± 220.2                         | 0.80  |
| Extended anticoagulation                                  | 9.6 %                                | 34.5 %                                | 0.006  | 20.6 %                                 | 34.8 %                                | 0.07  |
| Interval from diagnosis to study VQ scan (days) Mean ± SD | 266.7 ± 78.0                         | 234.5 ± 64.5                          | 0.05   | 337.6 ± 113.1                          | 305.6 ± 100.1                         | 0.09  |
| <u>Clinical laboratory</u>                                |                                      |                                       |        |                                        |                                       |       |
| Factor V <sub>Leiden</sub>                                | 11.1 %                               | 33.3 %                                | 0.05   | 7.6 %                                  | 2.3 %                                 | 0.29  |
| Prothrombin 10100a                                        | 14.8 %                               | 6.7 %                                 | 0.67   | 5.9 %                                  | 4.7 %                                 | 1.00  |
| Fibrinogen Aα T312A                                       | 53.5 %                               | 67.9 %                                | 0.26   | 36.8 %                                 | 38.5 %                                | 0.85  |
| AT3 (%) Mean ± SD                                         | 98.9 ± 12.5                          | 93.9 ± 13.7                           | 0.13   | 96.0 ± 10.9                            | 97.8 ± 11.8                           | 0.39  |
| Protein C (IU/dL) Mean ± SD                               | 99.1 ± 23.2                          | 96.4 ± 29.9                           | 0.49   | 105.8 ± 19.6                           | 98.9 ± 19.2                           | 0.10  |
| Protein S (IU/dL) Mean ± SD                               | 89.9 ± 21.5                          | 86.9 ± 19.0                           | 0.88   | 89.9 ± 22.0                            | 88.5 ± 20.3                           | 0.69  |
| Fibrinogen (g/L) Mean ± SD                                | 4.3 ± 1.1                            | 4.2 ± 1.1                             | 0.50   | 3.4 ± 0.8                              | 3.8 ± 1.1                             | 0.02  |

|                                                            |                |                |         |                |                |         |
|------------------------------------------------------------|----------------|----------------|---------|----------------|----------------|---------|
| Platelets amount/nL) Mean ± SD                             | 245.2 ± 87.2   | 293.8 ± 75.6   | 0.01    | 258.3 ± 70.1   | 260.3 ± 64.4   | 0.34    |
| Prothrombin ratio (% of control) Mean ± SD                 | 80.1 ± 17.6    | 76.3 ± 20.7    | 0.57    | 86.3 ± 18.5    | 77.0 ± 23.7    | 0.01    |
| Factor II (% of control) Mean ± SD                         | 88.5 ± 27.1    | 68.0 ± 34.4    | 0.07    | 94.3 ± 23.4    | 92.2 ± 37.1    | 0.72    |
| Factor V (% of control) Mean ± SD                          | 108.3 ± 28.0   | 99.9 ± 21.3    | 0.46    | 102.4 ± 26.0   | 107.8 ± 23.6   | 0.15    |
| Factor VII (% of control) Mean ± SD                        | 88.6 ± 39.2    | 81.0 ± 46.1    | 0.68    | 103.6 ± 36.1   | 91.1 ± 26.4    | 0.24    |
| <u>Fibrin property</u>                                     |                |                |         |                |                |         |
| Aα-chains not phosphorylated (%) Mean ± SD                 | 36.4 ± 7.0     | 36.2 ± 6.7     | 0.66    | 38.7 ± 10.9    | 38.5 ± 8.3     | 0.91    |
| Aα-chains monophosphorylated (%) Mean ± SD                 | 31.7 ± 2.4     | 31.7 ± 2.1     | 0.79    | 32.4 ± 3.8     | 32.9 ± 4.6     | 0.13    |
| Aα-chains diphosphorylated (%) Mean ± SD                   | 32.0 ± 6.2     | 32.1 ± 5.5     | 0.73    | 28.9 ± 9.3     | 28.7 ± 7.9     | 0.71    |
| Phosphorylations per Aα-chain                              | 0.96 ± 0.13    | 0.95 ± 0.12    | 0.78    | 0.90 ± 0.20    | 0.90 ± 0.16    | 0.95    |
| Bβ-chains monosialylated (%) Mean ± SD                     | 57.9 ± 7.9     | 59.1 ± 6.0     | 0.42    | 58.2 ± 6.8     | 59.7 ± 6.4     | 0.30    |
| Bβ-chains hydroxylated (%) Mean ± SD                       | 21.3 ± 5.3     | 20.1 ± 4.8     | 0.84    | 22.3 ± 11.5    | 22.6 ± 12.4    | 0.80    |
| des-gln461 Bβ-chains (%) Mean ± SD                         | 6.03 ± 1.81    | 5.74 ± 1.34    | 0.68    | 15.53 ± 11.49  | 12.11 ± 8.52   | 0.04    |
| γ-chains monosialylated (%) Mean ± SD                      | 71.9 ± 5.7     | 71.4 ± 6.4     | 0.64    | 69.8 ± 8.3     | 70.2 ± 7.8     | 0.80    |
| fibrinogen γ' (%) Mean ± SD                                | 3.6 ± 1.3      | 3.3 ± 1.4      | 0.32    | 2.3 ± 1.7      | 2.1 ± 1.5      | 0.61    |
| Aα-chains crosslinked                                      | 34.5 ± 15.5    | 34.5 ± 13.0    | 0.70    | 27.9 ± 11.1    | 27.9 ± 10.1    | 0.68    |
| Clot permeability (Ks Mean ± SD E-10) Mean ± SD            | 6.20 ± 2.40    | 6.10 ± 2.15    | 0.97    | 4.41 ± 2.01    | 4.78 ± 2.06    | 0.27    |
| Anti-β15-42 N terminus bound (ug) Mean ± SD                | 2.05 ± 0.73    | 2.07 ± 1.09    | 0.64    | 2.40 ± 0.72    | 2.18 ± 0.57    | 0.13    |
| Fibrin lot turbidity (OD <sub>max</sub> ) Mean ± SD        | 0.226 ± 0.048  | 0.220 ± 0.052  | 0.81    | 0.208 ± 0.061  | 0.201 ± 0.059  | 0.53    |
| Lysis rate (OD/min) Mean ± SD                              | -0.002 ± 0.000 | -0.002 ± 0.001 | 0.84    | -0.001 ± 0.000 | -0.001 ± 0.000 | 0.99    |
| Corrected lysis rate (OD/OD <sub>max</sub> /min) Mean ± SD | -0.787 ± 0.180 | -0.749 ± 0.198 | 0.46    | -0.702 ± 0.204 | -0.704 ± 0.199 | 0.91    |
| Lysis time (min) Mean ± SD                                 | 127.5 ± 21.1   | 129.4 ± 29.9   | 0.29    | 147.8 ± 39.0   | 143.2 ± 34.8   | 0.42    |
| <u>Outcomes</u>                                            |                |                |         |                |                |         |
| CTEPH                                                      | 0.0 %          | 6.9 %          | 0.08    | 0.7 %          | 10.9 %         | 0.004   |
| Residual pulm vasc obstruction (%) Mean ± SD               | 3.3 ± 2.7      | 23.0 ± 16.5    | < 0.001 | 1.1 ± 2.2      | 23.8 ± 15.7    | < 0.001 |

**Table S2. Comparison, within each cohort, of predictors in patients with and without residual pulmonary vascular obstruction.** Wilcoxon-Mann-Whitney was used to calculate p-values for continuous variables. Fisher's exact test was used for binary variables.

| Fibrin(ogen) property                                 | Predictive models for RPVO                    |                         |                                        |                         |
|-------------------------------------------------------|-----------------------------------------------|-------------------------|----------------------------------------|-------------------------|
|                                                       | Presentation, treatment and fibrin properties |                         | Obstruction and fibrin properties only |                         |
|                                                       | Cohort 1                                      | Cohort 2                | Cohort 1                               | Cohort 2 p              |
| Initial obstruction                                   |                                               |                         |                                        |                         |
| p                                                     | 0.000369                                      | 0.00680                 | 0.00003                                | 0.000423                |
| OR per 1% increase in obstruction (95% CI)            | 1.041<br>(1.018, 1.064)                       | 1.027<br>(1.007, 1.046) | 1.054<br>(1.028, 1.080)                | 1.034<br>(1.015, 1.054) |
| Interval from symptoms to diagnosis                   |                                               |                         |                                        |                         |
| p                                                     | 0.078758                                      | -                       | -                                      | -                       |
| OR per day (95% CI)                                   | 1.026<br>(0.997, 1.056)                       | -                       | -                                      | -                       |
| Age                                                   |                                               |                         |                                        |                         |
| p                                                     | -                                             | 0.01905                 | -                                      | -                       |
| OR per year (95% CI)                                  | -                                             | 1.035<br>(1.006, 1.065) | -                                      | -                       |
| Thrombolysis                                          |                                               |                         |                                        |                         |
| p                                                     | -                                             | 0.00986                 | -                                      | -                       |
| OR if used (95% CI)                                   | -                                             | 10.129<br>(1.745, 58.7) | -                                      | -                       |
| High B $\beta$ -chain mono sialylation                |                                               |                         |                                        |                         |
| p                                                     | 0.100657                                      | 0.00658                 | 0.0655                                 | 0.014425                |
| OR per 1% increase in monosialylation (95% CI)        | 1.074<br>(0.986, 1.168)                       | 1.178<br>(1.047, 1.326) | 1.095<br>(0.994, 1.206)                | 1.145<br>(1.027, 1.276) |
| Slow fibrin clot lysis rate                           |                                               |                         |                                        |                         |
| p                                                     | -                                             | -                       | 0.1737                                 | -                       |
| OR per 1% lysis per minute (95% CI)                   | -                                             | -                       | 10.872<br>(0.349, 338)                 | -                       |
| Low fibrinogen $\gamma'$                              |                                               |                         |                                        |                         |
| p                                                     | 0.040079                                      | -                       | 0.0388                                 | -                       |
| OR per 1% increase in $\gamma'$ (95% CI)              | 0.641<br>(0.419, 0.980)                       | -                       | 0.614<br>(0.386, 0.975)                | -                       |
| Low $\beta$ 15-42 N terminus accessibility            |                                               |                         |                                        |                         |
| p                                                     | -                                             | -                       | -                                      | 0.132860                |
| OR per each 1 $\mu$ g of anti- $\beta$ 15-42 retained | -                                             | -                       | -                                      | 0.549                   |

|                                                              |   |                         |   |                         |
|--------------------------------------------------------------|---|-------------------------|---|-------------------------|
| within the fibrin clot (95% CI)                              |   |                         |   | (0.251, 1.200)          |
| Low des-gln461 B $\beta$ -chain                              |   |                         |   |                         |
| p                                                            | - | 0.05757                 | - | 0.105844                |
| OR per 1% increase in des-gln461 B $\beta$ - chains (95% CI) | - | 0.945<br>(0.891, 1.002) | - | 0.955<br>(0.903, 1.010) |
| Low $\gamma$ -chain mono sialylation                         |   |                         |   |                         |
| p                                                            | - | 0.08098                 | - | 0.123704                |
| OR per 1% increase in monosialylation (95% CI)               | - | 0.923<br>(0.844, 1.010) | - | 0.937<br>(0.863, 1.018) |

**Table S3. Table 3. Fibrinogen predictors between the two cohorts of patients.** The p values are associated with the individual predictors within the optimal predictive model selected according to the Akaike Information Criterion for a specific cohort to be the most predictive of RPVO after acute pulmonary embolism.
